# Supplementary material for: Bias Correction and Application of Labeled Smartphone Pressure Data for Evaluating the Best Track of Landfalling Tropical Cyclones
Source: Copernicus journal article supplement (doi:10.5194/egusphere-2024-1505), 2024-07-02
Supplement: Supplementary file [file egusphere-2024-1505-AC2-supplement.pdf]

## Supplements for RC2

### Supplement 1 New Fig. 7

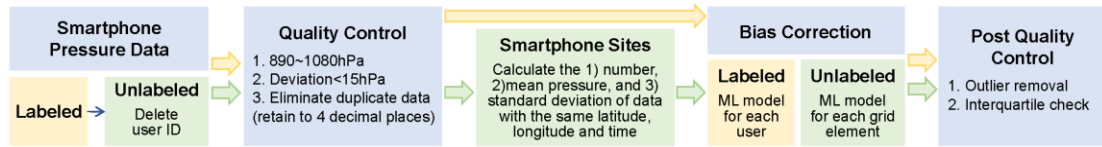

**Figure 7** The work flow for smartphone pressure data quality control and bias correction.
